# Supplementary material for: Complex organisation and structure of the ghrelin antisense strand gene GHRLOS, a candidate non-coding RNA gene
Source: PubMed Central journal article supplement (PMC2621237; doi:10.1186/1471-2199-9-95), 2008-10-28
Supplement: 1471-2199-9-95-S3.pdf [file 1471-2199-9-95-S3.pdf]

#### Additional File 4: Compilation of exons of *GHRLOS* transcripts.

This is a PDF file listing exons of *GHRLOS*. Exon and (bp) are indicated. Experimental evidence from this study and/or external references for each exon are shown.

| Exon       | Size  | Intron-size (bp)                                                                 | Experimental evidence of external reference                                 |
|------------|-------|----------------------------------------------------------------------------------|-----------------------------------------------------------------------------|
| Ia         | 51    | 1138 to exon IIa<br>1138 to exon IIb                                             | TSS: 5' RACE, RT-PCR                                                        |
| Ib         | ~1601 | 2520 to exon III<br>4746 to exon I                                               | TSS (CAGE cluster immediately upstream), RT-PCR                             |
| Ic         | ~526  | 1743 to exon IIb<br>1743 to exon IIb<br>3125 to exon III<br>5332 to exon I       | TSS (CAGE cluster immediately upstream), RT-PCR                             |
| Id         | ~994  | 185 to exon I $\alpha$<br>3593 to exon IIa<br>3593 to exon IIb<br>5820 to exon I | TSS (CAGE cluster immediately upstream), RT-PCR                             |
| I $\alpha$ | 283   | 1138 to exon IIa<br>1138 to exon IIb<br>2520 to exon III<br>4746 to exon I       | RT-PCR; Splices into 526 bp exon I and 96 bp exon I in the Hep G2 cell line |
| IIa        | 157   | 1225 to exon III<br>3452 to exon I                                               | RT-PCR                                                                      |
| IIb        | 96    | 1286 to exon III<br>3513 to exon I                                               | 5' RACE, RT-PCR                                                             |
| III        | 83    | 2144 to exon I                                                                   |                                                                             |
| 1a         | 86    | 1560 to 2a                                                                       | TSS [1]                                                                     |
| 1b         | 63    | 1434 to 2b                                                                       | TSS [1]                                                                     |
| 1c         | 28    | 2091 to 3a                                                                       | TSS [1]                                                                     |
| 1d         | 106   | 2091 to 3b<br>2149 to 3c<br>2149 to 3d<br>6214 to 4a<br>6469 to 4b               | RT-PCR, 5' RACE                                                             |
| 2a         | 68    | 463 to 3a<br>463 to 3b<br>520 to 3c<br>520 to 3d<br>4586 to 4a<br>4841 to 4b     | RT-PCR, [1]                                                                 |
| 2b         | 156   | 501 to 3a<br>501 to 3b<br>558 to 3c<br>558 to 3d<br>4624 to 4a<br>4879 to 4b     | RT-PCR                                                                      |
| 3a         | 156   |                                                                                  | RT-PCR, [1]                                                                 |
| 3b         | 162   | 3965 to exon 1*a<br>4220 to exon 1*b                                             | RT-PCR, [1]                                                                 |
| 3c         | 101   |                                                                                  | RT-PCR                                                                      |
| 3d         | 105   |                                                                                  | RT-PCR                                                                      |
| 4a         | ~1400 | Terminating exon                                                                 | Terminal exon 3' RACE                                                       |
| 4b         | ~1100 | Terminating exon                                                                 | Terminal exon, 3' RACE                                                      |

#### References

1. Seim I, Collet C, Herington AC, Chopin LK: **Revised genomic structure of the human ghrelin gene and identification of novel exons, alternative splice variants and natural antisense transcripts.** *BMC Genomics* 2007, **8**:298.
